# Supplementary material
Source: ML conference proceedings conference paper supplement (https://openreview.net/forum?id=YjNv-hzM8BE)
Supplement: supplementary_material [file attachment]

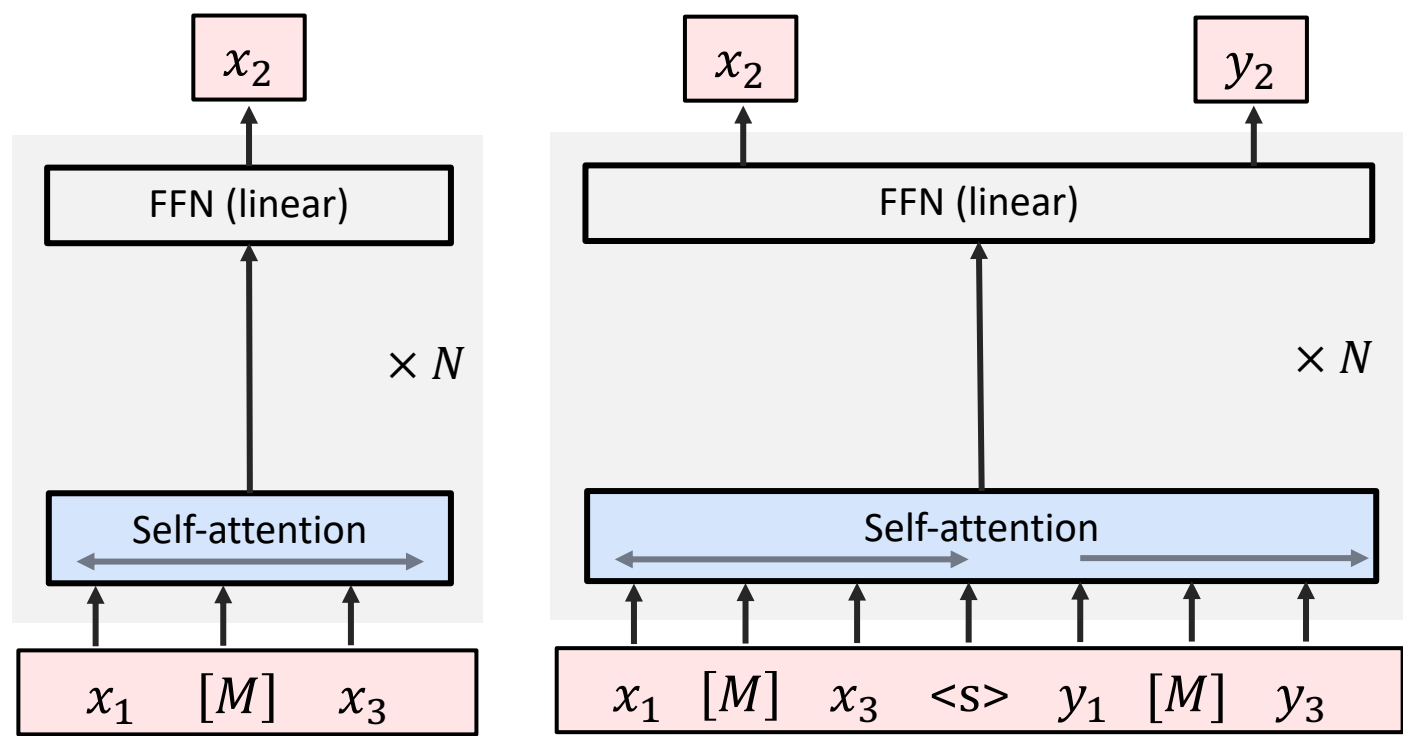

(a) Encoder-Only Models (e.g., Left: BERT, XLM-R; Right: UNILM)

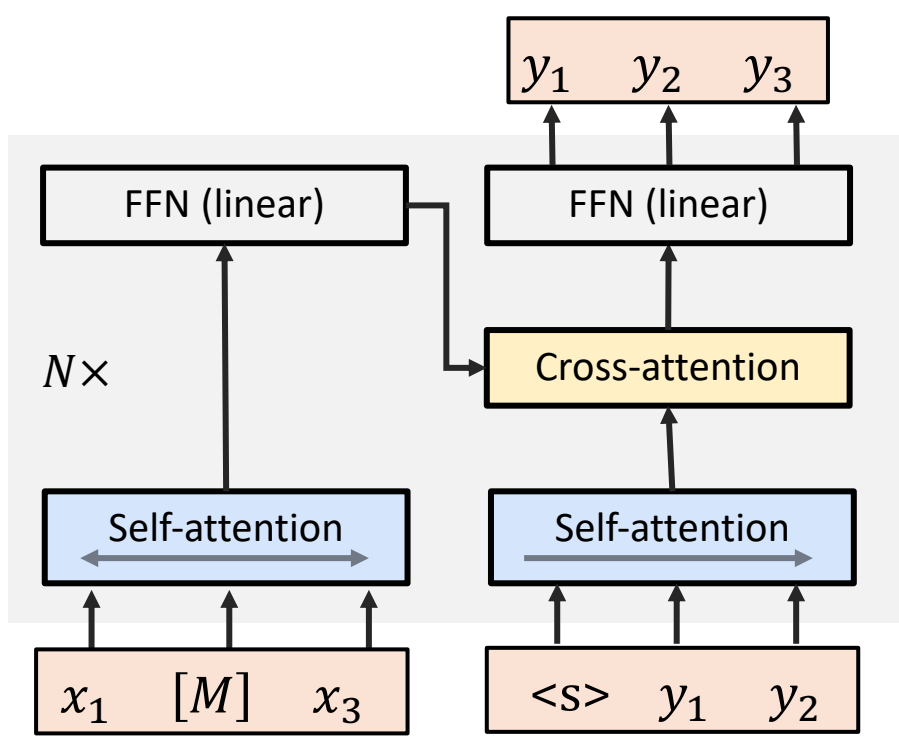

(b) Encoder-Decoder Models (e.g., BART)

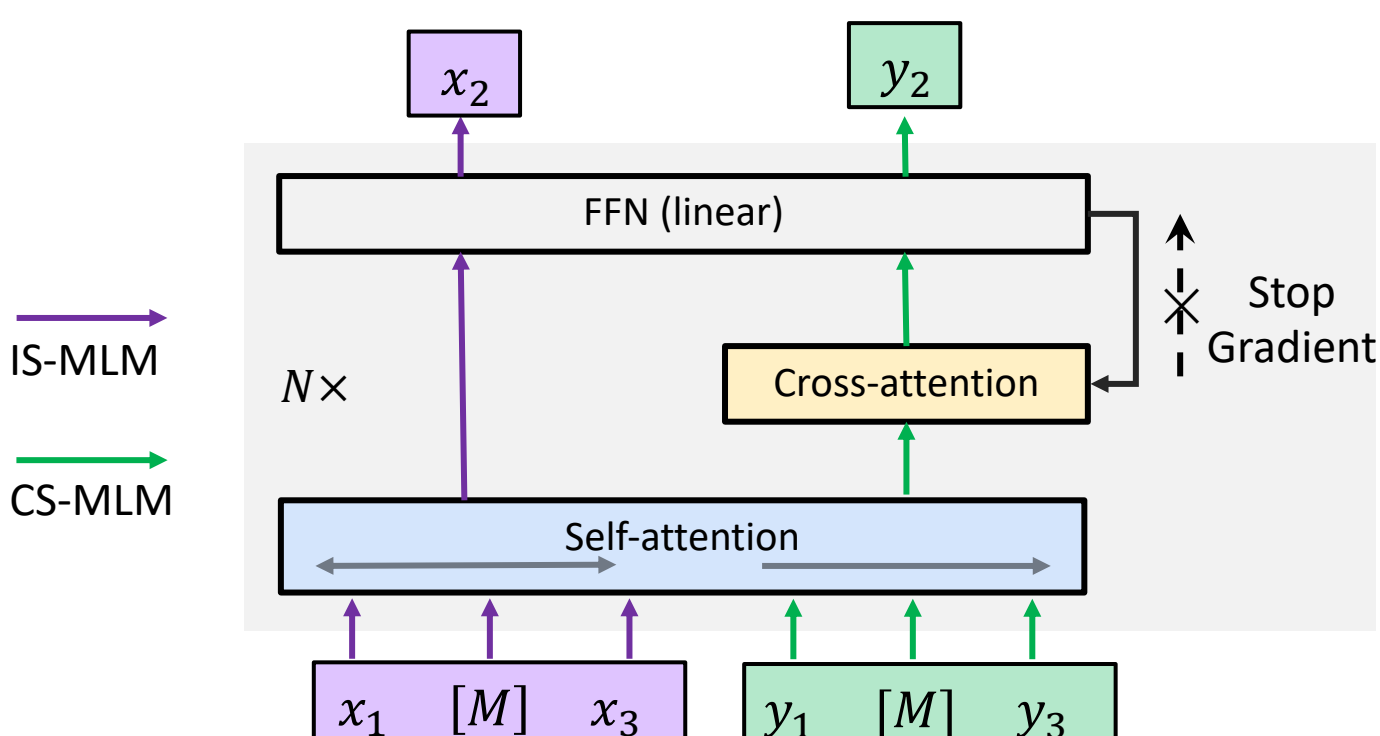

(c) Variable Encoder-Decoder (VECO)

| Comparisons                                    | Encoder-Only                                                                                                                                                                                                                | Encoder-Decoder                                                                                                                                                                              | Variable Encoder-Decoder (VECO)                                                                                                                                                                                                                                                                                      |
|------------------------------------------------|-----------------------------------------------------------------------------------------------------------------------------------------------------------------------------------------------------------------------------|----------------------------------------------------------------------------------------------------------------------------------------------------------------------------------------------|----------------------------------------------------------------------------------------------------------------------------------------------------------------------------------------------------------------------------------------------------------------------------------------------------------------------|
| How to build representations                   | Jointly encode the input $(x, y)$ , i.e., let them interact with each other starting <u>from the embedding layer</u>                                                                                                        | Firstly extract the “global” representation of $x$ <u>from the last layer of encoder</u> , and then interact with $y$ via extra Cross-attention                                              |                                                                                                                                                                                                                                                                                                                      |
| What’s the prediction task                     | Recover masked tokens                                                                                                                                                                                                       | Generate next words                                                                                                                                                                          | Recover masked tokens to <i>keep a more consistent optimization direction on shared parameters</i>                                                                                                                                                                                                                   |
| When applied to NLU (Stars are result ratings) | Use the whole encoder (Self-attention & FFN)<br>★★★★                                                                                                                                                                        | <ul style="list-style-type: none"> <li>Only extract encoder (e.g., MMTE): ★★</li> <li>Use both encoder and decoder (e.g., BART): ★★★</li> </ul>                                              | Extract Self-attention & FFN to initialize an encoder:<br>★★★★☆                                                                                                                                                                                                                                                      |
| When applied to NLG (Stars are result ratings) | Can not fully initialize the decoder (e.g., BERT, XLM-R), or change the traditional generation way (e.g., UNILM):<br>★★★                                                                                                    | Use the whole encoder-decoder<br>★★★★                                                                                                                                                        | Can provide complete initialization for an encoder-decoder<br>★★★★☆                                                                                                                                                                                                                                                  |
| Features                                       | <ul style="list-style-type: none"> <li>Compatible with various NLU tasks</li> <li>Compared to mainstream NLG framework, it lacks a “global” understanding of <math>x</math> when interacting with <math>y</math></li> </ul> | <ul style="list-style-type: none"> <li>Compatible with mainstream NLG framework</li> <li>Can not beat the encoder-only models on NLU tasks, even with more computation and memory</li> </ul> | <ul style="list-style-type: none"> <li><b>Flexibility</b>: Easily applicable to both encoder and encoder-decoder downstream frameworks with the most streamlined parameters</li> <li><b>Mutuality</b>: Enables NLU and NLG to boost each other, and achieve the SOTA results on various NLU and NLG tasks</li> </ul> |
